# Supplementary material
Source: publisher figshare collection journal article supplement (https://gsajournals.figshare.com/ndownloader/files/15684875)
Supplement: Supplementary file 1 [file 15684875]

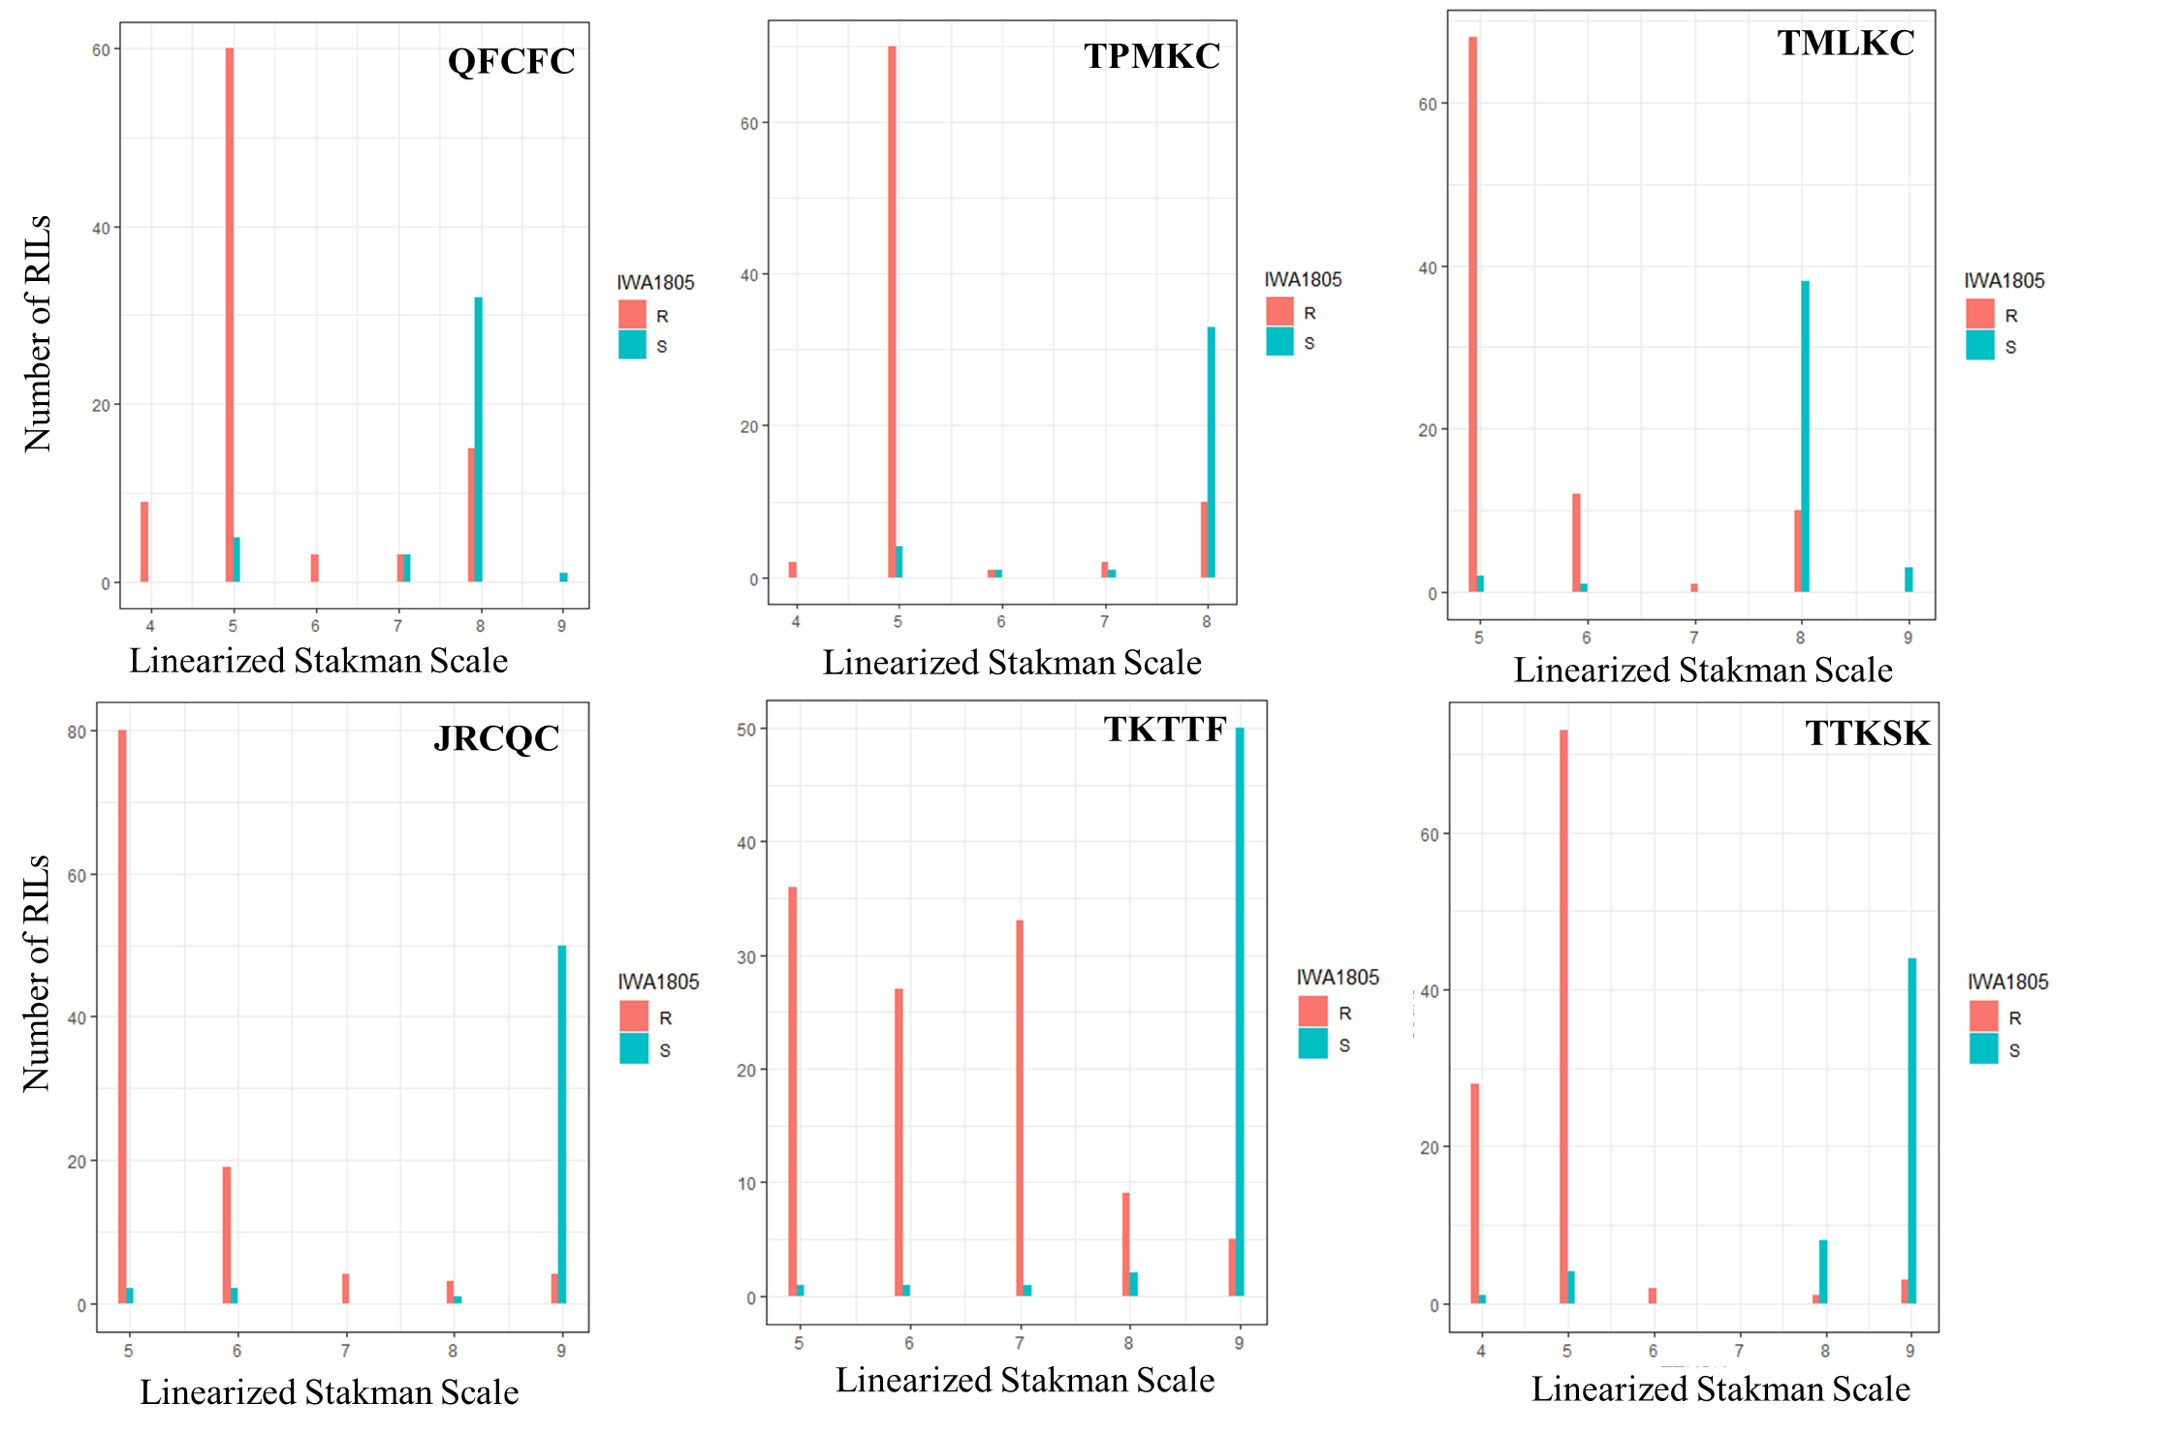


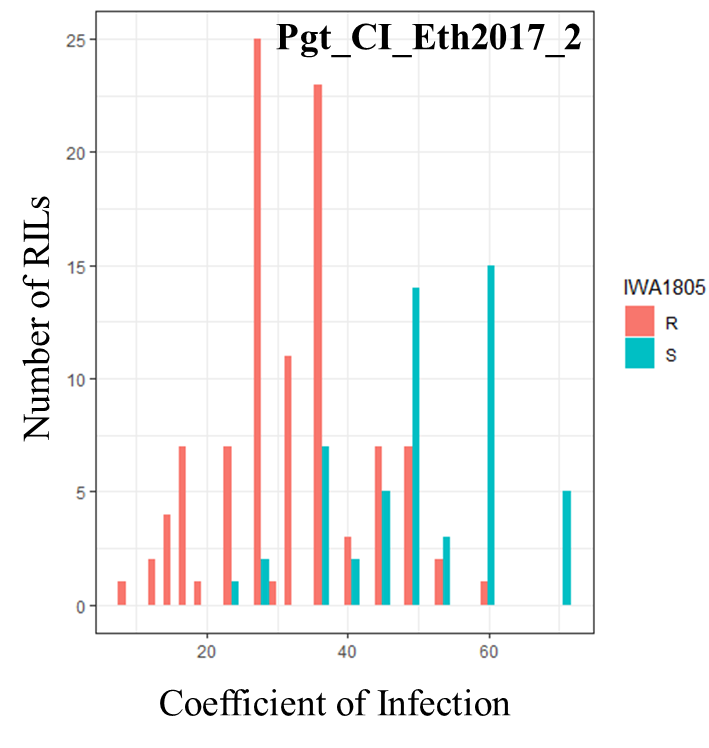


**Figure S3.1** Frequency distributions of Rusty × PI192051-1 recombinant inbred lines (RILs) for stem rust infection types at seedling stage and coefficient of infections at adult plant stage in Ethiopia based on segregation at the flanking marker of *QSr.ace.7A* *IWA1805*. RILs are segregating for the ‘G’ allele associated with resistance from PI 192051-1 and the ‘A’ allele associated with susceptibility from Rusty.


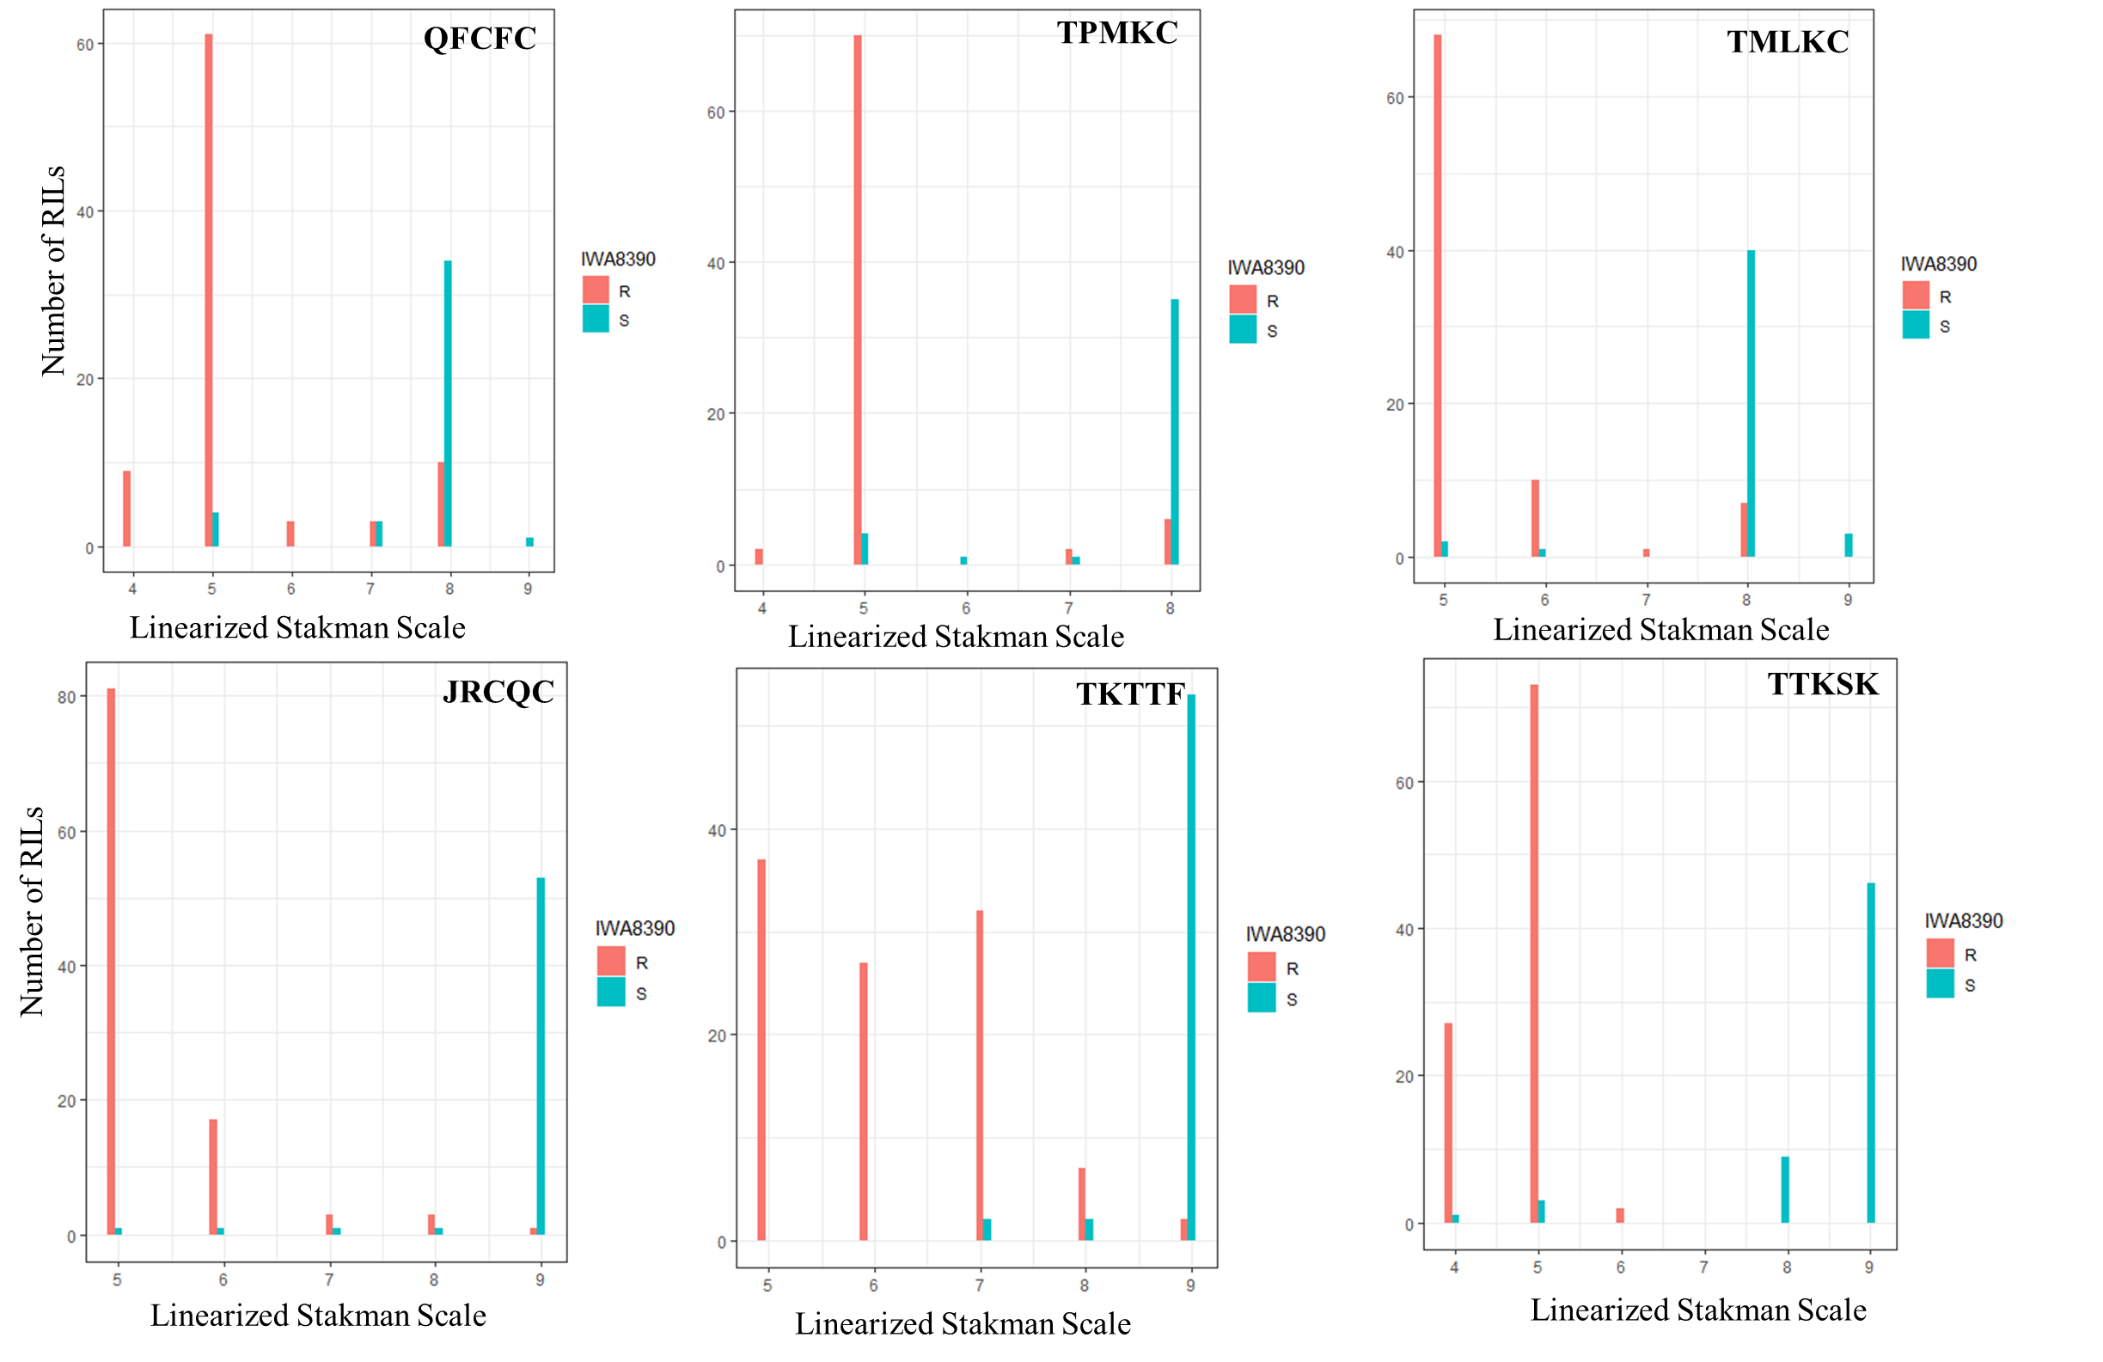


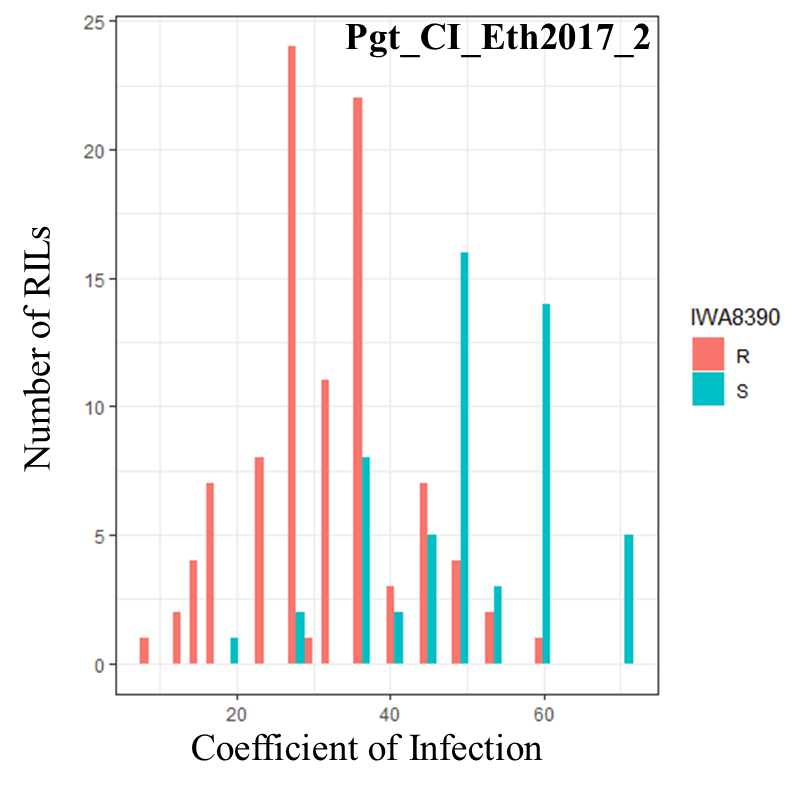


**Figure S3.2** Frequency distributions of Rusty × PI192051-1 recombinant inbred lines (RILs) for stem rust infection types at seedling stage and coefficient of infections at adult plant stage in Ethiopia based on segregation at the flanking marker of *QSr.ace.7A* *IWA8390*. RILs are segregating for the ‘C’ allele associated with resistance from PI 192051-1 and the ‘T’ allele associated with susceptibility from Rusty.
